# Supplementary material for: Liposomes can both enhance or reduce drugs penetration through the skin
Source: PubMed Central journal article supplement (PMC6125578; doi:10.1038/s41598-018-31693-y), 2018-09-05
Supplement: 41598_2018_31693_MOESM1_ESM.pdf [file 41598_2018_31693_MOESM1_ESM.pdf]

## SUPPLEMENTARY INFORMATION for

### Liposomes can both enhance or reduce drugs penetration through the skin

*Ma. F. Peralta<sup>a‡</sup>; Ma. L. Guzmán<sup>b‡</sup>; A. P. Pérez<sup>c</sup>; G. A. Apezteguia<sup>c</sup>; Ma. L. Fórmica<sup>b</sup>; E. L. Romero<sup>c</sup>;  
Ma. E. Olivera<sup>b</sup>; D. C. Carrer<sup>a\*</sup>*

<sup>‡</sup>These authors contributed equally to this work.

<sup>a</sup>Instituto de Investigación Médica M y M Ferreyra - CONICET- Universidad Nacional de Córdoba, Córdoba, Argentina.

<sup>b</sup>UNITEFA - CONICET; Pharmaceutical Sciences Department, School of Chemistry, National University of Córdoba, Córdoba, Argentina.

<sup>c</sup>Nanomedicine Research Program, National University of Quilmes, Quilmes, Argentina.

\*Corresponding author: Dolores C. Carrer, [dolorescarrer@immf.uncor.edu](mailto:dolorescarrer@immf.uncor.edu)

#### Supplementary Table 1

Validated methods for extraction and quantification of each drug for *in vitro* experiments performed in section 2.4 and 2.5: *In vitro* human skin penetration and drug extraction from skin and validation of quantification methods.

**Table S1** Methods for drug extraction and quantification from epidermis and dermis on human skin.

| Drug        | Drug extraction from epidermis                                                                                                                                                                                                                                 | Drug extraction from dermis                                                                                                                                                                                                                                                                       | HPLC quantification                                                                                                                                                                                                                 |
|-------------|----------------------------------------------------------------------------------------------------------------------------------------------------------------------------------------------------------------------------------------------------------------|---------------------------------------------------------------------------------------------------------------------------------------------------------------------------------------------------------------------------------------------------------------------------------------------------|-------------------------------------------------------------------------------------------------------------------------------------------------------------------------------------------------------------------------------------|
| <b>AmB</b>  | Extractive solution: 1 ml of methanol.<br><br>1. Vortexing for 1 min, 800 rpm<br>2. Sonication for 10 min<br>3. Incubation at room temperature for 24 hs<br>4. Vortexing for 1 min, 800 rpm<br>5. Sonication for 30 min                                        | Extractive solution: 2 ml of methanol.<br><br>1. Vortexing for 1 min, 800 rpm<br>2. Sonication for 30 min<br>3. Incubation at room temperature for 24 hs<br>4. Vortexing for 1 min, 800 rpm<br>5. Sonication for 30 min<br>6. Vortexing for 1 min, 800 rpm                                        | Column: reverse C18, 250x4 mm, 5 µm packing.<br>Mobile phase: acetonitrile/sodium acetate solution 0.05 M (45/55).<br>Flux: 1 ml/min.<br>Injection volume: 20 µl.<br>Temperature: 25 °C.<br>Wavelength: 405 nm.                     |
| <b>Imiq</b> | Extractive solution: 1 ml of 7:3 (v/v) MeOH: acetate buffer (pH 4.0, 100 mM).<br><br>1. Vortexing for 1 min, 800 rpm<br>2. Sonication for 10 min<br>3. Incubation at room temperature for 24 hs<br>4. Vortexing for 1 min, 800 rpm<br>5. Sonication for 30 min | Extractive solution: 2 ml of 7:3 (v/v) MeOH: acetate buffer (pH 4.0, 100 mM).<br><br>1. Vortexing for 1 min, 800 rpm<br>2. Sonication for 30 min<br>3. Incubation at room temperature for 24 hs<br>4. Vortexing for 1 min, 800 rpm<br>5. Sonication for 30 min<br>6. Vortexing for 1 min, 800 rpm | Column: C8, 125x4 mm, 5 µm packing.<br>Mobile phase: acetonitrile/sodium acetate solution 100 mM pH4/Diethylamine (30/69.85/0.15 v/v).<br>Flux: 1 ml/min.<br>Injection volume: 20 µl.<br>Temperature: 25 °C.<br>Wavelength: 242 nm. |

|                          |                                             |                                             |                                           |
|--------------------------|---------------------------------------------|---------------------------------------------|-------------------------------------------|
| <b>Ind</b>               | Extractive solution: 1 ml of methanol.      | Extractive solution: 1 ml of methanol.      | Column: C18, 250x4 mm, 5 $\mu$ m packing. |
|                          | 1. Vortexing for 1 min, 800 rpm             | 1. Vortexing for 1 min, 800 rpm             | Mobile phase: phosphate buffer 100 mM     |
|                          | 2. Sonication for 10 min                    | 2. Sonication for 10 min                    | pH3/acetonitrile 60:40 v/v.               |
|                          | 3. Incubation at room temperature for 24 hs | 3. Incubation at room temperature for 24 hs | Flux: 1 ml/min.                           |
|                          | 4. Vortexing for 1 min, 800 rpm             | 4. Vortexing for 1 min, 800 rpm             | Injection volume: 20 $\mu$ l.             |
| 5. Sonication for 30 min | 5. Sonication for 30 min                    | Temperature: 38 $^{\circ}$ C.               | Wavelength: 271 nm.                       |

AmB HPLC method was taken from Salerno et al., 2013<sup>1</sup>; Imiq HPLC method from De Paula et al., 2008<sup>2</sup> and Ind method was developed for this work<sup>3</sup>.

### Supplementary Figure 1

Topical application of ultraflexible liposomes suspensions including drugs and DiIC18, for the experiments of section 2.7: In vivo skin penetration in mice.

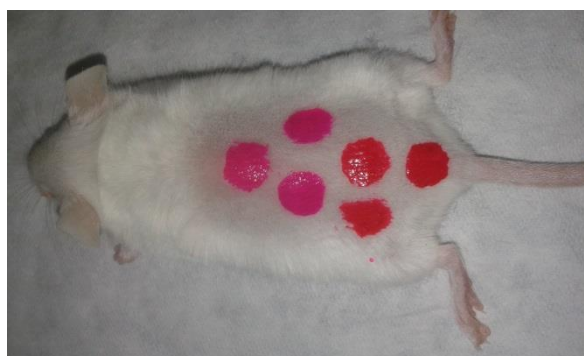

**Figure S1** Application of ultraflexible liposomes suspensions including drugs and DiIC18 on the back of anesthetized Balb/C mice.

### Supplementary Table 2

Results of extraction calibration experiments performed to measure drug retention in human skin.

**Table S2** Assessment of linearity, precision and accuracy of the methods used to quantify the amount of each drug in human skin samples. E=epidermis. D=dermis.

|                                      | AmB                                                   | Ind                                                   | Imiq                                                |
|--------------------------------------|-------------------------------------------------------|-------------------------------------------------------|-----------------------------------------------------|
| <b>Linearity</b>                     | 0.05 - 5 $\mu$ g/ml for E<br>0.1 - 5 $\mu$ g/ml for D | 0.3 - 3 $\mu$ g/ml for E<br>0.5 - 30 $\mu$ g/ml for D | 0.1-5 $\mu$ g/ml for E and D                        |
| <b>Calibration curve for E</b>       | Y = 93815X-2770<br>R <sup>2</sup> = 0.9993            | Y = 58193X-5071.3<br>R <sup>2</sup> = 0.9982          | Y = 130480X - 6383.2<br>R <sup>2</sup> = 0.999      |
| <b>Calibration curve for D</b>       | Y = 88694X-5169.8<br>R <sup>2</sup> = 0.999           | Y = 35756X-1271.7<br>R <sup>2</sup> = 0.9964          | Y = 116785X-6210.3<br>R <sup>2</sup> = 0.9982       |
| <b>Recovery percentages</b>          | 81.34 $\pm$ 2.86 % for E<br>66.9 $\pm$ 2.37 % for D   | 84.21 $\pm$ 2.33 % for E<br>55.53 $\pm$ 2.47 % for D  | 91.51 $\pm$ 1.6 % for E<br>69.17 $\pm$ 5.17 % for D |
| <b>Lower limit of Quantification</b> | 0.05 $\mu$ g/ml for E<br>0.1 $\mu$ g/ml for D         | 0.3 $\mu$ g/ml for E<br>0.5 $\mu$ g/ml for D          | 0.1 $\mu$ g/ml for E and D                          |

## References

1. Salerno, C. *et al.* Lipid-based microtubes for topical delivery of amphotericin B. *Colloids Surf. B. Biointerfaces* **107**, 160–166 (2013).
2. De Paula, D., Martins, C. A. & Bentley, M. V. L. B. Development and validation of HPLC method for imiquimod determination in skin penetration studies. *Biomed. Chromatogr.* **22**, 1416–1423 (2008).
3. Peralta, M. F.; Formica, M. L.; Palma, S. D.; Carrer, D. C. Development and validation of an HPLC method for quantification of Indole in a liposomal formulation. *Anal. Methods*. *Submitted*
